# Supplementary material for: The determinants of complication trajectories in American Indians with type 2 diabetes
Source: JCI journal article supplement (doi:10.1172/jci.insight.146849), 2021-05-23
Supplement: sd2 [file 2]

You are being redirected.
